# Supplementary material
Source: PubMed Central journal article supplement (PMC3349979)
Supplement: supp_jn.111.149344_149344_ST1-ST6.pdf [file supp_jn.111.149344_149344_ST1-ST6.pdf]

## Online Supporting Material: Substituting homemade fruit juice for sugar-sweetened beverages is associated with lower odds of metabolic syndrome among Hispanic adults

Supplemental Table 1: Age-adjusted characteristics by servings of fruit-based juices among Costa Rican adults<sup>1</sup>

| Serving<br><i>n</i> , %                       | Never <sup>4</sup> | Homemade fruit juice <sup>2</sup> |             |              | Fresco <sup>3</sup> |             |             |              |
|-----------------------------------------------|--------------------|-----------------------------------|-------------|--------------|---------------------|-------------|-------------|--------------|
|                                               |                    | ≤1 /week                          | 2-6/week    | ≥1/day       | Never               | ≤1 /week    | 2-6/week    | ≥1/day       |
|                                               | 811 (43.3)         | 354 (18.9)                        | 453 (24.2)  | 254 (13.6)   | 251 (13.4)          | 233 (12.5)  | 487 (26.0)  | 901 (48.1)   |
| Socio-demographic                             |                    |                                   |             |              |                     |             |             |              |
| Age, <i>y</i>                                 | 59.1 ± 10.5        | 54.4 ± 11.7                       | 55.7 ± 11.5 | 58.5 ± 11.5  | 59.0 ± 11.0         | 57.5 ± 11.1 | 56.3 ± 11.7 | 57.3 ± 11.2  |
| Sex, % <i>female</i>                          | 24.2               | 23.5                              | 25.4        | 27.0         | 24.2                | 27.8        | 25.4        | 23.7         |
| Area of residence, % <i>rural</i>             | 38.0               | 35.2                              | 43.6        | 46.4*        | 32.9                | 46.8        | 39.3        | 40.5         |
| Income, \$/ <i>week</i>                       | 475 ± 15           | 552 ± 22                          | 646 ± 19.5  | 828 ± 26*    | 557 ± 28            | 539 ± 28    | 578 ± 19    | 599 ± 14*    |
| Physical Activity, <i>METs</i>                | 37.1 ± 0.6         | 37.0 ± 0.9                        | 35.0 ± 0.8  | 33.4 ± 1.0*  | 36.9 ± 1.1          | 34.6 ± 1.1  | 34.8 ± 0.8  | 36.9 ± 0.6   |
| Current smoker, %                             | 26.5               | 20.8                              | 20.1        | 16.6*        | 31.5                | 20.3        | 21.9        | 20.9*        |
| Dietary factors                               |                    |                                   |             |              |                     |             |             |              |
| Total energy, <i>kcal/d</i>                   | 2380 ± 27          | 2494 ± 40                         | 2553 ± 36   | 2610 ± 47*   | 2237 ± 47           | 2311 ± 49   | 2400 ± 34   | 2624 ± 25*   |
| Alcohol <sup>8</sup> , <i>g/d</i>             | 5.7 ± 0.5          | 6.8 ± 0.8                         | 6.6 ± 0.7   | 7.0 ± 0.9    | 7.5 ± 0.9           | 5.8 ± 0.9   | 6.9 ± 0.6   | 5.8 ± 0.5    |
| Total carbohydrates <sup>8</sup> , <i>g/d</i> | 344 ± 1.6          | 341 ± 2.5                         | 339 ± 2.2   | 343 ± 2.9    | 331 ± 2.8           | 332 ± 2.9   | 332 ± 2.0   | 353 ± 1.5*   |
| Dietary fiber <sup>8</sup> , <i>g/d</i>       | 23.4 ± 0.2         | 22.6 ± 0.3                        | 22.9 ± 0.3  | 23.1 ± 0.4   | 22.2 ± 0.4          | 22.8 ± 0.4  | 23.0 ± 0.3  | 23.3 ± 0.2*  |
| PUFA: SFA ratio                               | 0.59 ± 0.01        | 0.61 ± 0.02                       | 0.60 ± 0.01 | 0.63 ± 0.02  | 0.60 ± 0.02         | 0.56 ± 0.02 | 0.60 ± 0.01 | 0.62 ± 0.01  |
| Caffeine <sup>8</sup> , <i>g/d</i>            | 355 ± 6.6          | 316 ± 10.0                        | 314 ± 8.8   | 264 ± 11.8*  | 371 ± 11.9          | 346 ± 12.5  | 320 ± 8.7   | 308 ± 6.3*   |
| Fresco, <i>s/d</i>                            | 0.9 ± 0.04         | 1.1 ± 0.1                         | 1.0 ± 0.1   | 1.1 ± 0.1    | -                   | -           | -           | -            |
| Homemade fruit juice, <i>s/d</i>              | -                  | -                                 | -           | -            | 0.21 ± 0.03         | 0.29 ± 0.03 | 0.31 ± 0.02 | 0.34 ± 0.02* |
| Instant drinks, <i>s/d</i>                    | 0.34 ± 0.02        | 0.37 ± 0.03                       | 0.27 ± 0.03 | 0.25 ± 0.04* | 0.52 ± 0.04         | 0.47 ± 0.04 | 0.36 ± 0.03 | 0.20 ± 0.02* |
| Regular soda, <i>s/d</i>                      | 0.14 ± 0.02        | 0.17 ± 0.02                       | 0.20 ± 0.02 | 0.17 ± 0.03  | 0.19 ± 0.03         | 0.19 ± 0.03 | 0.16 ± 0.02 | 0.15 ± 0.01  |
| Low-fat milk, <i>s/d</i>                      | 0.22 ± 0.02        | 0.24 ± 0.04                       | 0.29 ± 0.03 | 0.39 ± 0.04* | 0.27 ± 0.04         | 0.21 ± 0.04 | 0.25 ± 0.03 | 0.28 ± 0.02  |
| Water, <i>s/d</i>                             | 2.7 ± 0.1          | 2.7 ± 0.1                         | 2.9 ± 0.1   | 3.2 ± 0.1*   | 3.0 ± 0.1           | 2.5 ± 0.1   | 2.7 ± 0.1   | 2.9 ± 0.1    |
| Sugar added <sup>9</sup> , <i>tsp/d</i>       | 6.8 ± 0.2          | 5.2 ± 0.3                         | 5.3 ± 0.2   | 3.6 ± 0.3*   | 6.4 ± 0.3           | 6.3 ± 0.4   | 5.8 ± 0.2   | 5.3 ± 0.2*   |
| Fruits, <i>s/d</i>                            | 3.8 ± 0.1          | 3.9 ± 0.2                         | 4.1 ± 0.1   | 4.0 ± 0.2    | 3.3 ± 0.2           | 3.2 ± 0.2   | 3.6 ± 0.1   | 4.5 ± 0.1*   |
| Biomarkers                                    |                    |                                   |             |              |                     |             |             |              |
| BMI, <i>kg/m<sup>2</sup></i>                  | 26.0 ± 0.1         | 26.1 ± 0.2                        | 26.5 ± 0.2  | 26.5 ± 0.3*  | 26.1 ± 0.3          | 26.3 ± 0.3  | 26.2 ± 0.2  | 26.2 ± 0.1   |
| Systolic BP, <i>mmHg</i>                      | 135 ± 0.7          | 136 ± 1.1                         | 137 ± 0.9   | 134 ± 1.2    | 136 ± 1.3           | 133 ± 1.3   | 137 ± 0.9   | 135 ± 0.7    |
| Diastolic BP, <i>mmHg</i>                     | 81.3 ± 0.4         | 81.5 ± 0.6                        | 82.4 ± 0.5  | 82.3 ± 0.7   | 81.2 ± 0.7          | 81.0 ± 0.7  | 82.3 ± 0.5  | 81.7 ± 0.4   |
| Waist circumference, <i>cm</i>                | 89.7 ± 0.4         | 90.1 ± 0.5                        | 91.0 ± 0.5  | 90.7 ± 0.6   | 89.8 ± 0.6          | 89.7 ± 0.7  | 90.0 ± 0.5  | 90.5 ± 0.3   |
| HDL-C, <i>mmol/L</i>                          | 1.04 ± 0.01        | 1.05 ± 0.01                       | 1.08 ± 0.01 | 1.08 ± 0.01* | 1.06 ± 0.01         | 1.05 ± 0.02 | 1.06 ± 0.01 | 1.05 ± 0.01  |
| Plasma triglycerides, <i>mmol/L</i>           | 2.36 ± 0.05        | 2.37 ± 0.07                       | 2.50 ± 0.07 | 2.52 ± 0.09  | 2.39 ± 0.09         | 2.41 ± 0.09 | 2.42 ± 0.06 | 2.44 ± 0.05  |
| Fasting plasma glucose, <i>mmol/L</i>         | 4.24 ± 0.04        | 4.22 ± 0.07                       | 4.29 ± 0.06 | 4.15 ± 0.08  | 4.30 ± 0.08         | 4.25 ± 0.08 | 4.22 ± 0.06 | 4.22 ± 0.04  |
| Metabolic Syndrome, %                         | 29.1               | 26.9                              | 32.4        | 26.9         | 31.4                | 30.8        | 28.8        | 28.4         |

<sup>1</sup>Data shown as mean ± standard deviation, or percent. BP: blood pressure. *n*=1,872. \**P*-trend<0.05

<sup>2</sup>Homemade fruit juice: 100% juice from freshly squeezed orange or other fruit, not mixed with other ingredients. Does not include commercial juices.

<sup>3</sup>Fresco: a traditional juice from freshly squeezed fruit diluted in water and mixed with sugar.

<sup>4</sup>Never or less than one serving (s)/month.

<sup>5</sup>Energy adjusted using the residuals method. <sup>6</sup>Sugar added to food or beverages.

## Online Supporting Material: Substituting homemade fruit juice for sugar-sweetened beverages is associated with lower odds of metabolic syndrome among Hispanic adults

Supplemental Table 2: Age-adjusted characteristics by servings of sugar-sweetened beverages among Costa Rican adults<sup>1</sup>

| Serving<br><i>n</i> , % |                                               | Instant drinks <sup>2</sup>       |                        |                        |                      | Regular soda <sup>3</sup> |                        |                        |                    |
|-------------------------|-----------------------------------------------|-----------------------------------|------------------------|------------------------|----------------------|---------------------------|------------------------|------------------------|--------------------|
|                         |                                               | Never <sup>4</sup><br>1049 (56.0) | ≤1 /week<br>219 (11.7) | 2-6/week<br>341 (18.2) | ≥1/day<br>263 (14.1) | Never<br>1131 (60.4)      | ≤1 /week<br>383 (20.5) | 2-6/week<br>271 (14.5) | ≥1/day<br>87 (4.7) |
| Socio-demographic       |                                               |                                   |                        |                        |                      |                           |                        |                        |                    |
|                         | Age, <i>y</i>                                 | 58.9 ± 10.7                       | 55.9 ± 11.5            | 55.1 ± 12.0            | 55.0 ± 11.4*         | 59.7 ± 10.6               | 55.3 ± 11.8            | 51.6 ± 11.7            | 53.0 ± 11.6*       |
|                         | Sex, % <i>female</i>                          | 25.5                              | 24.4                   | 24.9                   | 21.6                 | 27.7                      | 23.6                   | 16.8                   | 15.9*              |
|                         | Area of residence, % <i>rural</i>             | 42.6                              | 43.0                   | 31.4                   | 38.1*                | 39.7                      | 37.5                   | 44.5                   | 40.6               |
|                         | Income, \$/ <i>week</i>                       | 596 ± 13                          | 592 ± 29               | 559 ± 23               | 536 ± 27*            | 575 ± 13                  | 568 ± 22               | 624 ± 26               | 570 ± 47           |
|                         | Physical Activity, <i>METs</i>                | 36.3 ± 0.5                        | 35.3 ± 1.1             | 35.3 ± 0.9             | 37.0 ± 1.0           | 35.6 ± 0.7                | 38.1 ± 0.9             | 34.0 ± 1.0             | 37.0 ± 1.8         |
|                         | Current smoker, %                             | 22.5                              | 20.2                   | 21.9                   | 25.2                 | 22.6                      | 21.8                   | 20.4                   | 20.4               |
| Dietary factors         |                                               |                                   |                        |                        |                      |                           |                        |                        |                    |
|                         | Total energy, <i>kcal/d</i>                   | 2424 ± 24                         | 2451 ± 51              | 2532 ± 41              | 2620 ± 47*           | 2376 ± 22                 | 2459 ± 38              | 2729 ± 46              | 3049 ± 80**        |
|                         | Alcohol <sup>8</sup> , <i>g/d</i>             | 6.8 ± 0.4                         | 6.5 ± 1.0              | 5.8 ± 0.8              | 4.5 ± 0.9*           | 6.4 ± 0.4                 | 4.6 ± 0.7              | 7.9 ± 0.9              | 6.9 ± 1.5          |
|                         | Total carbohydrates <sup>8</sup> , <i>g/d</i> | 343 ± 1.4                         | 341 ± 3.1              | 338 ± 2.5              | 346 ± 2.9            | 341 ± 1.4                 | 346 ± 2.4              | 337 ± 2.9              | 342 ± 5.0          |
|                         | Dietary fiber <sup>8</sup> , <i>g/d</i>       | 23.4 ± 0.2                        | 23.2 ± 0.4             | 22.9 ± 0.3             | 21.8 ± 0.4*          | 23.7 ± 0.2                | 23.5 ± 0.3             | 21.0 ± 0.6             | 18.5 ± 0.6*        |
|                         | PUFA: SFA ratio                               | 0.61 ± 0.01                       | 0.61 ± 0.02            | 0.59 ± 0.02            | 0.59 ± 0.02          | 0.60 ± 0.01               | 0.61 ± 0.02            | 0.59 ± 0.02            | 0.60 ± 0.03        |
|                         | Caffeine <sup>8</sup> , <i>g/d</i>            | 324 ± 5.9                         | 305 ± 12.8             | 333 ± 10.3             | 336 ± 12             | 328 ± 5.7                 | 334 ± 9.7              | 319 ± 11.7             | 269 ± 20.4*        |
|                         | Fresco, <i>s/d</i>                            | 1.2 ± 0.03                        | 1.1 ± 0.1              | 0.75 ± 0.1             | 0.58 ± 0.1*          | 1.0 ± 0.03                | 0.94 ± 0.1             | 1.1 ± 0.1              | 0.79 ± 0.1         |
|                         | Homemade fruit juice, <i>s/d</i>              | 0.33 ± 0.02                       | 0.29 ± 0.03            | 0.28 ± 0.03            | 0.26 ± 0.03*         | 0.31 ± 0.01               | 0.27 ± 0.02            | 0.35 ± 0.03            | 0.37 ± 0.05        |
|                         | Instant drinks, <i>s/d</i>                    | -                                 | -                      | -                      | -                    | 0.28 ± 0.02               | 0.36 ± 0.03            | 0.33 ± 0.04            | 0.48 ± 0.07*       |
|                         | Regular soda, <i>s/d</i>                      | 0.15 ± 0.01                       | 0.13 ± 0.03            | 0.18 ± 0.02            | 0.21 ± 0.03*         | -                         | -                      | -                      | -                  |
|                         | Low-fat milk, <i>s/d</i>                      | 0.31 ± 0.02                       | 0.23 ± 0.04            | 0.21 ± 0.04            | 0.18 ± 0.04*         | 0.26 ± 0.02               | 0.22 ± 0.03            | 0.33 ± 0.04            | 0.28 ± 0.07        |
|                         | Water, <i>s/d</i>                             | 2.8 ± 0.1                         | 2.9 ± 0.1              | 2.8 ± 0.1              | 2.6 ± 0.1            | 3.0 ± 0.1                 | 2.5 ± 0.1              | 2.6 ± 0.1              | 2.6 ± 0.2*         |
|                         | Sugar added <sup>9</sup> , <i>tsp/d</i>       | 5.5 ± 0.2                         | 5.7 ± 0.4              | 5.8 ± 0.3              | 6.3 ± 0.3*           | 5.6 ± 0.2                 | 6.1 ± 0.3              | 5.8 ± 0.3              | 4.5 ± 0.6          |
|                         | Fruits, <i>s/d</i>                            | 4.1 ± 0.1                         | 3.8 ± 0.2              | 3.8 ± 0.2              | 3.5 ± 0.2*           | 4.0 ± 0.1                 | 3.9 ± 0.2              | 3.5 ± 0.2              | 4.4 ± 0.3          |
| Biomarkers              |                                               |                                   |                        |                        |                      |                           |                        |                        |                    |
|                         | BMI, <i>kg/m<sup>2</sup></i>                  | 26.0 ± 0.1                        | 26.7 ± 0.3             | 26.1 ± 0.2             | 26.7 ± 0.3           | 26.1 ± 0.1                | 25.9 ± 0.2             | 26.5 ± 0.3             | 27.6 ± 0.4*        |
|                         | Systolic BP, <i>mmHg</i>                      | 135 ± 0.6                         | 137 ± 1.4              | 135 ± 1.1              | 135 ± 1.2            | 135 ± 0.6                 | 135 ± 1.0              | 137 ± 1.2              | 137 ± 2.2          |
|                         | Diastolic BP, <i>mmHg</i>                     | 81.5 ± 0.3                        | 83.0 ± 0.7             | 81.6 ± 0.6             | 81.7 ± 0.7           | 81.2 ± 0.3                | 82.4 ± 0.6             | 82.4 ± 0.7             | 83.7 ± 1.2*        |
|                         | Waist circumference, <i>cm</i>                | 89.5 ± 0.3                        | 91.4 ± 0.7             | 90.3 ± 0.5             | 91.7 ± 0.6*          | 89.7 ± 0.3                | 89.7 ± 0.5             | 91.8 ± 0.6             | 94.8 ± 1.1*        |
|                         | HDL-C, <i>mmol/L</i>                          | 1.06 ± 0.01                       | 1.06 ± 0.02            | 1.06 ± 0.01            | 1.04 ± 0.01          | 1.06 ± 0.01               | 1.07 ± 0.01            | 1.05 ± 0.01            | 1.03 ± 0.02        |
|                         | Plasma triglycerides, <i>mmol/L</i>           | 2.32 ± 0.04                       | 2.46 ± 0.09            | 2.60 ± 0.08            | 2.58 ± 0.09*         | 2.37 ± 0.04               | 2.52 ± 0.07            | 2.39 ± 0.09            | 2.67 ± 0.15        |
|                         | Fasting plasma glucose, <i>mmol/L</i>         | 4.20 ± 0.04                       | 4.26 ± 0.08            | 4.24 ± 0.07            | 4.32 ± 0.07          | 4.19 ± 0.04               | 4.29 ± 0.06            | 4.25 ± 0.08            | 4.44 ± 0.13        |
|                         | Metabolic Syndrome, %                         | 26.9                              | 31.8                   | 29.7                   | 35.9*                | 29.2                      | 29.5                   | 26.5                   | 36.7               |

<sup>1</sup>Data shown as mean ± standard deviation, or percent. BP: blood pressure. *n*=1,872. \**P*-trend<0.05

<sup>2</sup>Instant drink: instant sugary powder mix prepared with water, or a juice box.

<sup>3</sup>Regular soda: non-diet, carbonated beverages with or without caffeine.

<sup>4</sup>Never or less than one serving (s)/month.

<sup>5</sup>Energy adjusted using the residuals method. <sup>6</sup>Sugar added to food or beverages.

## Online Supporting Material: Substituting homemade fruit juice for sugar-sweetened beverages is associated with lower odds of metabolic syndrome among Hispanic adults

Supplemental Table 3: Age-adjusted characteristics by serving of combined SSB among Costa Rican adults<sup>1</sup>

| Serving<br><i>n</i> , %                       | SSB (instant drink and regular soda) <sup>2</sup> |                        |                        |                      |
|-----------------------------------------------|---------------------------------------------------|------------------------|------------------------|----------------------|
|                                               | Never <sup>3</sup><br>705 (37.7)                  | ≤1 /week<br>289 (15.4) | 2-6/week<br>533 (28.5) | ≥1/day<br>345 (18.4) |
| Socio-demographic                             |                                                   |                        |                        |                      |
| Age, <i>y</i>                                 | 60.7 ± 10.0                                       | 57.2 ± 10.6            | 54.6 ± 12.0            | 54.6 ± 11.4*         |
| Sex, % <i>female</i>                          | 29.6                                              | 21.6                   | 22.6                   | 20.8*                |
| Area of residence, % <i>rural</i>             | 43.2                                              | 40.8                   | 34.6                   | 40.9                 |
| Income, \$/ <i>week</i>                       | 584 ± 17                                          | 605 ± 25               | 578 ± 19               | 555 ± 24             |
| Physical Activity, <i>METs</i>                | 35.7 ± 0.6                                        | 36.2 ± 1.0             | 35.9 ± 0.7             | 37.1 ± 0.9           |
| Current smoker, %                             | 20.5                                              | 24.5                   | 22.1                   | 25.7                 |
| Dietary factors                               |                                                   |                        |                        |                      |
| Total energy, <i>kcal/d</i>                   | 2318 ± 29                                         | 2460 ± 44              | 2541 ± 33              | 2705 ± 40*           |
| Alcohol <sup>8</sup> , <i>g/d</i>             | 6.6 ± 0.5                                         | 5.5 ± 0.8              | 6.7 ± 0.6              | 5.7 ± 0.8            |
| Total carbohydrates <sup>8</sup> , <i>g/d</i> | 342 ± 1.8                                         | 347 ± 2.7              | 338 ± 2.0              | 344 ± 2.5            |
| Dietary fiber <sup>8</sup> , <i>g/d</i>       | 24.0 ± 0.2                                        | 23.8 ± 0.3             | 22.6 ± 0.3             | 21.0 ± 0.3*          |
| PUFA: SFA ratio                               | 0.60 ± 0.01                                       | 0.62 ± 0.02            | 0.60 ± 0.01            | 0.59 ± 0.02          |
| Caffeine <sup>8</sup> , <i>g/d</i>            | 323 ± 7.3                                         | 322 ± 11.2             | 330 ± 8.3              | 325 ± 10.3           |
| Fresco, <i>s/d</i>                            | 1.1 ± 0.04                                        | 1.02 ± 0.1             | 0.094 ± 0.04           | 0.63 ± 0.1*          |
| Homemade fruit juice, <i>s/d</i>              | 0.33 ± 0.02                                       | 0.32 ± 0.03            | 0.29 ± 0.02            | 0.29 ± 0.03          |
| SSB, <i>s/d</i>                               | -                                                 | -                      | -                      | -                    |
| Low-fat milk, <i>s/d</i>                      | 0.30 ± 0.03                                       | 0.24 ± 0.04            | 0.28 ± 0.03            | 0.20 ± 0.04          |
| Water, <i>s/d</i>                             | 3.0 ± 0.1                                         | 2.7 ± 0.1              | 2.7 ± 0.1              | 2.6 ± 0.1*           |
| Sugar added <sup>9</sup> , <i>tsp/d</i>       | 5.4 ± 0.2                                         | 5.9 ± 0.3              | 5.8 ± 0.2              | 5.9 ± 0.3            |
| Fruits, <i>s/d</i>                            | 4.2 ± 0.1                                         | 4.0 ± 0.2              | 3.7 ± 0.1              | 3.7 ± 0.2*           |
| Biomarkers                                    |                                                   |                        |                        |                      |
| BMI, <i>kg/m<sup>2</sup></i>                  | 25.9 ± 0.2                                        | 26.2 ± 0.2             | 26.2 ± 0.2             | 26.6 ± 0.2*          |
| Systolic BP, <i>mmHg</i>                      | 135 ± 0.8                                         | 136 ± 1.2              | 136 ± 0.9              | 135 ± 1.1            |
| Diastolic BP, <i>mmHg</i>                     | 80.8 ± 0.4                                        | 82.9 ± 0.6             | 82.2 ± 0.5             | 81.8 ± 0.6           |
| Waist circumference, <i>cm</i>                | 88.9 ± 0.4                                        | 90.4 ± 0.6             | 90.8 ± 0.4             | 91.9 ± 0.5*          |
| HDL-C, <i>mmol/L</i>                          | 1.06 ± 0.01                                       | 1.07 ± 0.01            | 1.05 ± 0.01            | 1.04 ± 0.01          |
| Plasma triglycerides, <i>mmol/L</i>           | 2.25 ± 0.05                                       | 2.43 ± 0.08            | 2.52 ± 0.06            | 2.60 ± 0.07*         |
| Fasting plasma glucose, <i>mmol/L</i>         | 4.18 ± 0.05                                       | 4.18 ± 0.07            | 4.26 ± 0.05            | 4.35 ± 0.07*         |
| Metabolic Syndrome, %                         | 26.9                                              | 27.1                   | 30.4                   | 34.0                 |

<sup>1</sup>Data shown as mean ± standard deviation, or percent. BP: blood pressure. SSB: Sugar-sweetened beverages. *n*=1,872. \**P*-trend<0.05

<sup>2</sup>SSB: combined instant drink and regular soda. Instant drink: instant sugary powder mix prepared with water, or a juice box. Regular soda: non-diet, carbonated beverages with or without caffeine.

<sup>3</sup>Never or less than one serving (s)/month.

<sup>4</sup>Energy adjusted using the residuals method.

<sup>5</sup>Sugar added to food or beverages.

**Online Supporting Material: Substituting homemade fruit juice for sugar-sweetened beverages is associated with lower odds of metabolic syndrome among Hispanic adults**

Supplemental Table 4: Multivariate adjusted means for metabolic factors by servings of fruit-based beverages in Costa Ricans<sup>1</sup>

|                                       | Homemade fruit juice <sup>2</sup> |                   |                   |                   |       | <i>P</i> -trend   | Fresco <sup>3</sup> |                   |                   |                 |  |
|---------------------------------------|-----------------------------------|-------------------|-------------------|-------------------|-------|-------------------|---------------------|-------------------|-------------------|-----------------|--|
|                                       | Never <sup>4</sup>                | ≤1 /week          | 2-6/week          | ≥1/day            | Never |                   | ≤1 /week            | 2-6/week          | ≥1/day            | <i>P</i> -trend |  |
| Waist circumference, <i>cm</i>        |                                   |                   |                   |                   |       |                   |                     |                   |                   |                 |  |
| Model 1                               | 87.2 ± 0.4                        | 87.1 ± 0.6        | 88.1 ± 0.5        | 87.4 ± 0.7        | 0.467 | 87.1 ± 0.7        | 87.2 ± 0.7          | 87.2 ± 0.5        | 87.7 ± 0.4        | 0.247           |  |
| Model 2                               | 87.5 ± 0.4                        | 87.1 ± 0.6        | 88.1 ± 0.5        | 87.3 ± 0.7        | 0.826 | 87.4 ± 0.7        | 87.7 ± 0.7          | 87.4 ± 0.5        | 87.6 ± 0.4        | 0.804           |  |
| Model 3                               | 87.6 ± 0.4                        | 87.1 ± 0.6        | 88.1 ± 0.5        | 87.3 ± 0.7        | 0.935 | 87.0 ± 0.7        | 87.6 ± 0.7          | 87.4 ± 0.5        | 87.9 ± 0.4        | 0.231           |  |
| Systolic BP, <i>mmHg</i>              |                                   |                   |                   |                   |       |                   |                     |                   |                   |                 |  |
| Model 1                               | 132 ± 0.9                         | 133 ± 1.2         | 133 ± 1.1         | 131 ± 1.4         | 0.651 | 133 ± 1.4         | 130 ± 1.5           | 134 ± 1.1         | 132 ± 0.9         | 0.665           |  |
| Model 2                               | 132 ± 0.9                         | 133 ± 1.2         | 134 ± 1.2         | 131 ± 1.5         | 0.509 | 133 ± 1.4         | 131 ± 1.5           | 134 ± 1.1         | 132 ± 0.9         | 0.449           |  |
| Model 3                               | 132 ± 0.9                         | 133 ± 1.2         | 134 ± 1.2         | 131 ± 1.5         | 0.436 | 133 ± 1.4         | 131 ± 1.5           | 134 ± 1.1         | 132 ± 0.9         | 0.480           |  |
| Diastolic BP, <i>mmHg</i>             |                                   |                   |                   |                   |       |                   |                     |                   |                   |                 |  |
| Model 1                               | 79.1 ± 0.5                        | 79.0 ± 0.7        | 79.8 ± 0.6        | 79.4 ± 0.8        | 0.472 | 79.0 ± 0.7        | 78.4 ± 0.8          | 79.8 ± 0.6        | 79.3 ± 0.5        | 0.557           |  |
| Model 2                               | 79.2 ± 0.5                        | 79.1 ± 0.7        | 79.8 ± 0.6        | 79.4 ± 0.8        | 0.553 | 79.0 ± 0.7        | 78.6 ± 0.8          | 79.9 ± 0.6        | 79.3 ± 0.5        | 0.812           |  |
| Model 3                               | 79.2 ± 0.5                        | 79.1 ± 0.7        | 79.8 ± 0.6        | 79.4 ± 0.8        | 0.584 | 78.9 ± 0.7        | 78.6 ± 0.8          | 79.9 ± 0.6        | 79.3 ± 0.5        | 0.716           |  |
| HDL-C, <i>mmol/L</i>                  |                                   |                   |                   |                   |       |                   |                     |                   |                   |                 |  |
| Model 1                               | 1.07 ± 0.01                       | 1.08 ± 0.01       | 1.10 ± 0.01       | 1.10 ± 0.02       | 0.035 | 1.08 ± 0.02       | 1.08 ± 0.02         | 1.09 ± 0.01       | 1.08 ± 0.01       | 0.999           |  |
| Model 2                               | 1.07 ± 0.01                       | 1.08 ± 0.01       | 1.10 ± 0.01       | 1.10 ± 0.02       | 0.024 | 1.08 ± 0.02       | 1.08 ± 0.02         | 1.09 ± 0.01       | 1.08 ± 0.01       | 0.987           |  |
| Model 3                               | 1.07 ± 0.01                       | 1.08 ± 0.01       | 1.10 ± 0.01       | 1.10 ± 0.02       | 0.033 | 1.08 ± 0.02       | 1.08 ± 0.02         | 1.09 ± 0.01       | 1.08 ± 0.01       | 0.812           |  |
| Plasma triglycerides, <i>mmol/L</i>   |                                   |                   |                   |                   |       |                   |                     |                   |                   |                 |  |
| Model 1                               | 2.10 (2.01, 2.21)                 | 2.08 (1.95, 2.20) | 2.18 (2.09, 2.39) | 2.15 (2.01, 2.29) | 0.266 | 2.08 (1.95, 2.21) | 2.08 (1.93, 2.22)   | 2.11 (2.01, 2.22) | 2.16 (2.07, 2.25) | 0.181           |  |
| Model 2                               | 2.10 (2.01, 2.19)                 | 2.08 (1.95, 2.20) | 2.19 (2.08, 2.36) | 2.15 (2.01, 2.29) | 0.261 | 2.08 (1.94, 2.21) | 2.08 (1.94, 2.24)   | 2.11 (2.01, 2.22) | 2.15 (2.06, 2.25) | 0.247           |  |
| Model 3                               | 2.09 (2.00, 2.19)                 | 2.07 (1.94, 2.19) | 2.20 (2.09, 2.33) | 2.15 (2.00, 2.29) | 0.229 | 2.04 (1.91, 2.18) | 2.06 (1.92, 2.20)   | 2.11 (2.00, 2.22) | 2.17 (2.08, 2.26) | 0.052           |  |
| Fasting plasma glucose, <i>mmol/L</i> |                                   |                   |                   |                   |       |                   |                     |                   |                   |                 |  |
| Model 1                               | 4.05 (3.97, 4.14)                 | 4.02 (3.91, 4.13) | 4.04 (3.94, 4.14) | 3.94 (3.81, 4.06) | 0.128 | 4.09 (3.97, 4.22) | 4.07 (3.94, 4.21)   | 4.02 (3.93, 4.13) | 3.99 (3.91, 4.07) | 0.086           |  |
| Model 2                               | 4.06 (3.98, 4.15)                 | 4.02 (3.91, 4.15) | 4.05 (3.94, 4.15) | 3.95 (3.82, 4.07) | 0.121 | 4.07 (4.00, 4.26) | 4.06 (3.98, 4.25)   | 4.04 (3.94, 4.14) | 3.99 (3.90, 4.07) | 0.016           |  |
| Model 3                               | 4.06 (3.98, 4.15)                 | 4.02 (3.90, 4.13) | 4.05 (3.94, 4.15) | 3.95 (3.83, 4.08) | 0.152 | 4.11 (3.98, 4.24) | 4.10 (3.97, 4.24)   | 4.04 (3.94, 4.14) | 3.99 (3.91, 4.08) | 0.052           |  |

<sup>1</sup>Shown as adjusted mean ± SEM, or adjusted geometric mean (95%CI) for back-transformed values of triglycerides and glucose. Model 1: Adjusted for age, sex, area of residence, income, alcohol intake, smoking, physical activity. Model 2: Model 1 + dietary fiber (quintiles), PUFA:SFA ratio (quintiles), sugar added to food or beverages (quintiles), caffeine (quintiles), low fat milk (servings per day) and fruit consumption (servings/day). Model 3: Model 2 + other beverages depending on the model (fresco, homemade fruit juice, instant drinks, regular soda, water). BP: blood pressure. *n*=1,872

<sup>2</sup>Homemade fruit juice: 100% juice from freshly squeezed orange or other fruit, not mixed with other ingredients. Does not include commercial juices.

<sup>3</sup>Fresco: a traditional juice from freshly squeezed fruit diluted in water and mixed with sugar. <sup>4</sup>Never or less than one serving (s)/month.

**Online Supporting Material: Substituting homemade fruit juice for sugar-sweetened beverages is associated with lower odds of metabolic syndrome among Hispanic adults**

Supplemental Table 5: Multivariate adjusted means for metabolic factors by servings of sugar-sweetened beverages in Costa Ricans<sup>1</sup>

|                                       | Never <sup>4</sup> | Instant drinks <sup>2</sup> |                   |                    |        | <i>P</i> -trend   | Regular soda <sup>3</sup> |                   |                   |         | <i>P</i> -trend |
|---------------------------------------|--------------------|-----------------------------|-------------------|--------------------|--------|-------------------|---------------------------|-------------------|-------------------|---------|-----------------|
|                                       |                    | ≤1 /week                    | 2-6/week          | ≥1/day             |        |                   | Never                     | ≤1 /week          | 2-6/week          | ≥1/day  |                 |
| <b>Waist circumference, cm</b>        |                    |                             |                   |                    |        |                   |                           |                   |                   |         |                 |
| Model 1                               | 86.8 ± 0.4         | 88.5 ± 0.7                  | 87.4 ± 0.6        | 88.9 ± 0.7*        | 0.004  | 87.1 ± 0.4        | 87.0 ± 0.6                | 88.3 ± 0.7        | 91.5 ± 1.1*       | <0.0001 |                 |
| Model 2                               | 86.9 ± 0.4         | 88.9 ± 0.7*                 | 87.6 ± 0.6        | 89.0 ± 0.7*        | 0.005  | 87.3 ± 0.4        | 87.3 ± 0.6                | 88.4 ± 0.7        | 90.8 ± 1.1*       | 0.001   |                 |
| Model 3                               | 86.8 ± 0.4         | 88.9 ± 0.7*                 | 87.7 ± 0.6        | 89.3 ± 0.7*        | 0.001  | 87.2 ± 0.4        | 87.4 ± 0.6                | 88.5 ± 0.7        | 90.9 ± 1.1*       | 0.0004  |                 |
| <b>Systolic BP, mmHg</b>              |                    |                             |                   |                    |        |                   |                           |                   |                   |         |                 |
| Model 1                               | 132 ± 0.9          | 133 ± 1.5                   | 133 ± 1.2         | 132 ± 1.4          | 0.752  | 132 ± 0.8         | 132 ± 1.2                 | 134 ± 1.4         | 134 ± 2.3         | 0.148   |                 |
| Model 2                               | 133 ± 0.9          | 133 ± 1.5                   | 133 ± 1.3         | 132 ± 1.4          | 0.724  | 132 ± 0.9         | 132 ± 1.2                 | 134 ± 1.4         | 134 ± 2.3         | 0.225   |                 |
| Model 3                               | 133 ± 0.9          | 133 ± 1.5                   | 133 ± 1.3         | 132 ± 1.4          | 0.636  | 132 ± 0.9         | 132 ± 1.2                 | 134 ± 1.4         | 134 ± 2.3         | 0.207   |                 |
| <b>Diastolic BP, mmHg</b>             |                    |                             |                   |                    |        |                   |                           |                   |                   |         |                 |
| Model 1                               | 79.1 ± 0.5         | 80.2 ± 0.8                  | 79.2 ± 0.7        | 79.3 ± 0.7         | 0.970  | 78.9 ± 0.4        | 80.2 ± 0.6                | 79.4 ± 0.7        | 80.9 ± 1.2        | 0.119   |                 |
| Model 2                               | 79.1 ± 0.5         | 80.3 ± 0.8                  | 79.3 ± 0.7        | 79.3 ± 0.7         | 0.966  | 78.9 ± 0.5        | 80.2 ± 0.6                | 79.4 ± 0.8        | 80.8 ± 1.2        | 0.189   |                 |
| Model 3                               | 79.1 ± 0.5         | 80.3 ± 0.8                  | 79.3 ± 0.7        | 79.4 ± 0.7         | 0.852  | 78.9 ± 0.5        | 80.2 ± 0.6                | 79.5 ± 0.8        | 80.7 ± 1.2        | 0.156   |                 |
| <b>HDL-C, mmol/L</b>                  |                    |                             |                   |                    |        |                   |                           |                   |                   |         |                 |
| Model 1                               | 1.09 ± 0.01        | 1.08 ± 0.02                 | 1.09 ± 0.01       | 1.07 ± 0.02        | 0.347  | 1.08 ± 0.01       | 1.10 ± 0.01               | 1.08 ± 0.02       | 1.07 ± 0.03       | 0.300   |                 |
| Model 2                               | 1.09 ± 0.01        | 1.08 ± 0.02                 | 1.09 ± 0.01       | 1.07 ± 0.02        | 0.335  | 1.08 ± 0.01       | 1.10 ± 0.01               | 1.07 ± 0.02       | 1.06 ± 0.03       | 0.320   |                 |
| Model 3                               | 1.09 ± 0.01        | 1.09 ± 0.02                 | 1.09 ± 0.01       | 1.07 ± 0.02        | 0.333  | 1.08 ± 0.01       | 1.10 ± 0.01               | 1.08 ± 0.02       | 1.06 ± 0.03       | 0.365   |                 |
| <b>Plasma triglycerides, mmol/L</b>   |                    |                             |                   |                    |        |                   |                           |                   |                   |         |                 |
| Model 1                               | 2.06 (1.98, 2.15)  | 2.18 (2.01, 2.32)           | 2.16 (2.04, 2.29) | 2.28 (2.13, 2.43)* | 0.002  | 2.09 (2.01, 2.17) | 2.20 (2.09, 2.34)         | 2.10 (1.97, 2.25) | 2.33 (2.09, 2.59) | 0.143   |                 |
| Model 2                               | 2.04 (1.97, 2.13)  | 2.16 (2.01, 2.32)           | 2.17 (2.04, 2.30) | 2.29 (2.15, 2.45)* | 0.001  | 2.08 (2.00, 2.17) | 2.20 (2.08, 2.29)         | 2.11 (1.98, 2.26) | 2.33 (2.09, 2.60) | 0.100   |                 |
| Model 3                               | 2.03 (1.95, 2.12)  | 2.16 (2.01, 2.32)           | 2.19 (2.07, 2.33) | 2.33 (2.18, 2.48)* | 0.0001 | 2.08 (2.00, 2.17) | 2.20 (2.08, 2.33)         | 2.11 (1.98, 2.26) | 2.34 (2.10, 2.61) | 0.099   |                 |
| <b>Fasting plasma glucose, mmol/L</b> |                    |                             |                   |                    |        |                   |                           |                   |                   |         |                 |
| Model 1                               | 3.99 (3.91, 4.07)  | 4.06 (3.92, 4.20)           | 4.03 (3.92, 4.15) | 4.13 (4.01, 4.26)  | 0.045  | 4.01 (3.93, 4.09) | 4.07 (3.96, 4.19)         | 4.04 (3.91, 4.17) | 4.10 (3.89, 4.31) | 0.431   |                 |
| Model 2                               | 3.98 (3.92, 4.08)  | 4.07 (3.94, 4.21)           | 4.05 (3.94, 4.16) | 4.13 (4.01, 4.26)  | 0.059  | 4.02 (3.95, 4.10) | 4.06 (3.97, 4.20)         | 4.03 (3.90, 4.16) | 4.06 (3.86, 4.29) | 0.783   |                 |
| Model 3                               | 4.00 (3.92, 4.09)  | 4.07 (3.94, 4.21)           | 4.04 (3.96, 4.15) | 4.12 (3.99, 4.25)  | 0.131  | 4.02 (3.83, 4.10) | 4.07 (3.96, 4.19)         | 4.03 (3.90, 4.16) | 4.05 (3.85, 4.27) | 0.842   |                 |

<sup>1</sup>Shown as adjusted mean ± SEM, or adjusted geometric mean (95%CI) for back-transformed values of triglycerides and glucose. Model 1: Adjusted for age, sex, area of residence, income, alcohol intake, smoking, physical activity. Model 2: Model 1 + dietary fiber (quintiles), PUFA:SFA ratio (quintiles), sugar added to food or beverages (quintiles), caffeine (quintiles), low fat milk (servings per day) and fruit consumption (servings/day). Model 3: Model 2 + other beverages depending on the model (fresco, homemade fruit juice, instant drinks, regular soda, water). *n*=1,872. \*Significantly different from lowest category, *P*<0.05.

<sup>2</sup>Instant drink: instant sugary powder mix prepared with water, or a juice box.

<sup>3</sup>Regular soda: non-diet, carbonated beverages with or without caffeine.

<sup>4</sup>Never or less than one serving (s)/month.

**Online Supporting Material: Substituting homemade fruit juice for sugar-sweetened beverages is associated with lower odds of metabolic syndrome among Hispanic adults**

Supplemental Table 6: Multivariate adjusted means for metabolic factors by servings of combined SSB in Costa Ricans<sup>1</sup>

|                                       | Never <sup>3</sup> | SSB (instant drinks and regular soda) <sup>2</sup> |                   |                    | P-trend |
|---------------------------------------|--------------------|----------------------------------------------------|-------------------|--------------------|---------|
|                                       |                    | ≤1 /week                                           | 2-6/week          | ≥1/day             |         |
| <b>Waist circumference, cm</b>        |                    |                                                    |                   |                    |         |
| Model 1                               | 86.4 ± 0.5         | 87.4 ± 0.6                                         | 87.7 ± 0.5        | 88.0 ± 0.6*        | <0.0001 |
| Model 2                               | 86.5 ± 0.5         | 87.8 ± 0.6                                         | 87.9 ± 0.5*       | 88.9 ± 0.6*        | 0.0004  |
| Model 3                               | 86.3 ± 0.5         | 87.7 ± 0.6                                         | 88.0 ± 0.5*       | 89.2 ± 0.6*        | <0.0001 |
| <b>Systolic BP, mmHg</b>              |                    |                                                    |                   |                    |         |
| Model 1                               | 132 ± 1.0          | 133 ± 1.3                                          | 133 ± 1.1         | 132 ± 1.2          | 0.906   |
| Model 2                               | 132 ± 1.0          | 133 ± 1.3                                          | 133 ± 1.1         | 132 ± 1.3          | 0.783   |
| Model 3                               | 132 ± 1.0          | 133 ± 1.3                                          | 133 ± 1.1         | 132 ± 1.3          | 0.736   |
| <b>Diastolic BP, mmHg</b>             |                    |                                                    |                   |                    |         |
| Model 1                               | 78.4 ± 0.5         | 80.5 ± 0.7*                                        | 79.6 ± 0.6        | 79.4 ± 0.7         | 0.506   |
| Model 2                               | 79.5 ± 0.5         | 80.6 ± 0.7*                                        | 79.6 ± 0.6        | 79.4 ± 0.7         | 0.614   |
| Model 3                               | 78.5 ± 0.5         | 80.5 ± 0.7*                                        | 79.7 ± 0.6        | 79.4 ± 0.7         | 0.482   |
| <b>HDL-C, mmol/L</b>                  |                    |                                                    |                   |                    |         |
| Model 1                               | 1.09 ± 0.01        | 1.10 ± 0.01                                        | 1.08 ± 0.01       | 1.07 ± 0.01        | 0.266   |
| Model 2                               | 1.08 ± 0.01        | 1.10 ± 0.01                                        | 1.08 ± 0.01       | 1.07 ± 0.01        | 0.248   |
| Model 3                               | 1.08 ± 0.01        | 1.11 ± 0.01                                        | 1.08 ± 0.01       | 1.07 ± 0.01        | 0.265   |
| <b>Plasma triglycerides, mmol/L</b>   |                    |                                                    |                   |                    |         |
| Model 1                               | 5.18 (5.14, 5.23)  | 5.25 (5.19, 5.31)                                  | 5.24 (5.19, 5.29) | 5.31 (5.25, 5.37)* | 0.0006  |
| Model 2                               | 5.18 (5.13, 5.23)  | 5.25 (5.18, 5.31)                                  | 5.24 (5.19, 5.29) | 5.32 (5.26, 5.38)* | 0.0002  |
| Model 3                               | 5.18 (5.13, 5.22)  | 5.24 (5.18, 5.30)                                  | 5.25 (5.19, 5.30) | 5.33 (5.27, 5.39)* | <0.0001 |
| <b>Fasting plasma glucose, mmol/L</b> |                    |                                                    |                   |                    |         |
| Model 1                               | 4.28 (4.25, 4.30)  | 4.27 (4.24, 4.30)                                  | 4.29 (4.27, 4.31) | 4.31 (4.28, 4.34)  | 0.013   |
| Model 2                               | 4.28 (4.26, 4.30)  | 4.27 (4.24, 4.30)                                  | 4.29 (4.27, 4.32) | 4.31 (4.28, 4.32)  | 0.031   |
| Model 3                               | 4.28 (4.26, 4.30)  | 4.27 (4.24, 4.30)                                  | 4.29 (4.27, 4.31) | 4.30 (4.28, 4.33)  | 0.066   |

<sup>1</sup>Shown as adjusted mean ± SEM, or adjusted geometric mean (95%CI) for back-transformed values of triglycerides and glucose. Model 1: Adjusted for age, sex, area of residence, income, alcohol intake, smoking, physical activity. Model 2: Model 1 + dietary fiber (quintiles), PUFA:SFA ratio (quintiles), sugar added to food or beverages (quintiles), caffeine (quintiles), low fat milk (servings per day) and fruit consumption (servings/day). Model 3: Model 2 + fresco, homemade fruit juice, water. BP: blood pressure. SSB: Sugar-sweetened beverages. n=1,872. \*Significantly different from lowest category, P<0.05.

<sup>2</sup>SSB: combined instant drink and regular soda. Instant drink: instant sugary powder mix prepared with water, or a juice box. Regular soda: non-diet, carbonated beverages with or without caffeine.

<sup>3</sup>Never or less than one serving (s)/month.
